# Supplementary material
Source: publisher figshare collection journal article supplement (https://tandf.figshare.com/ndownloader/files/20326614)

Fig. S1: Standard (integral) XRD data-curve corresponding to the differential data depicted in Fig. 1.


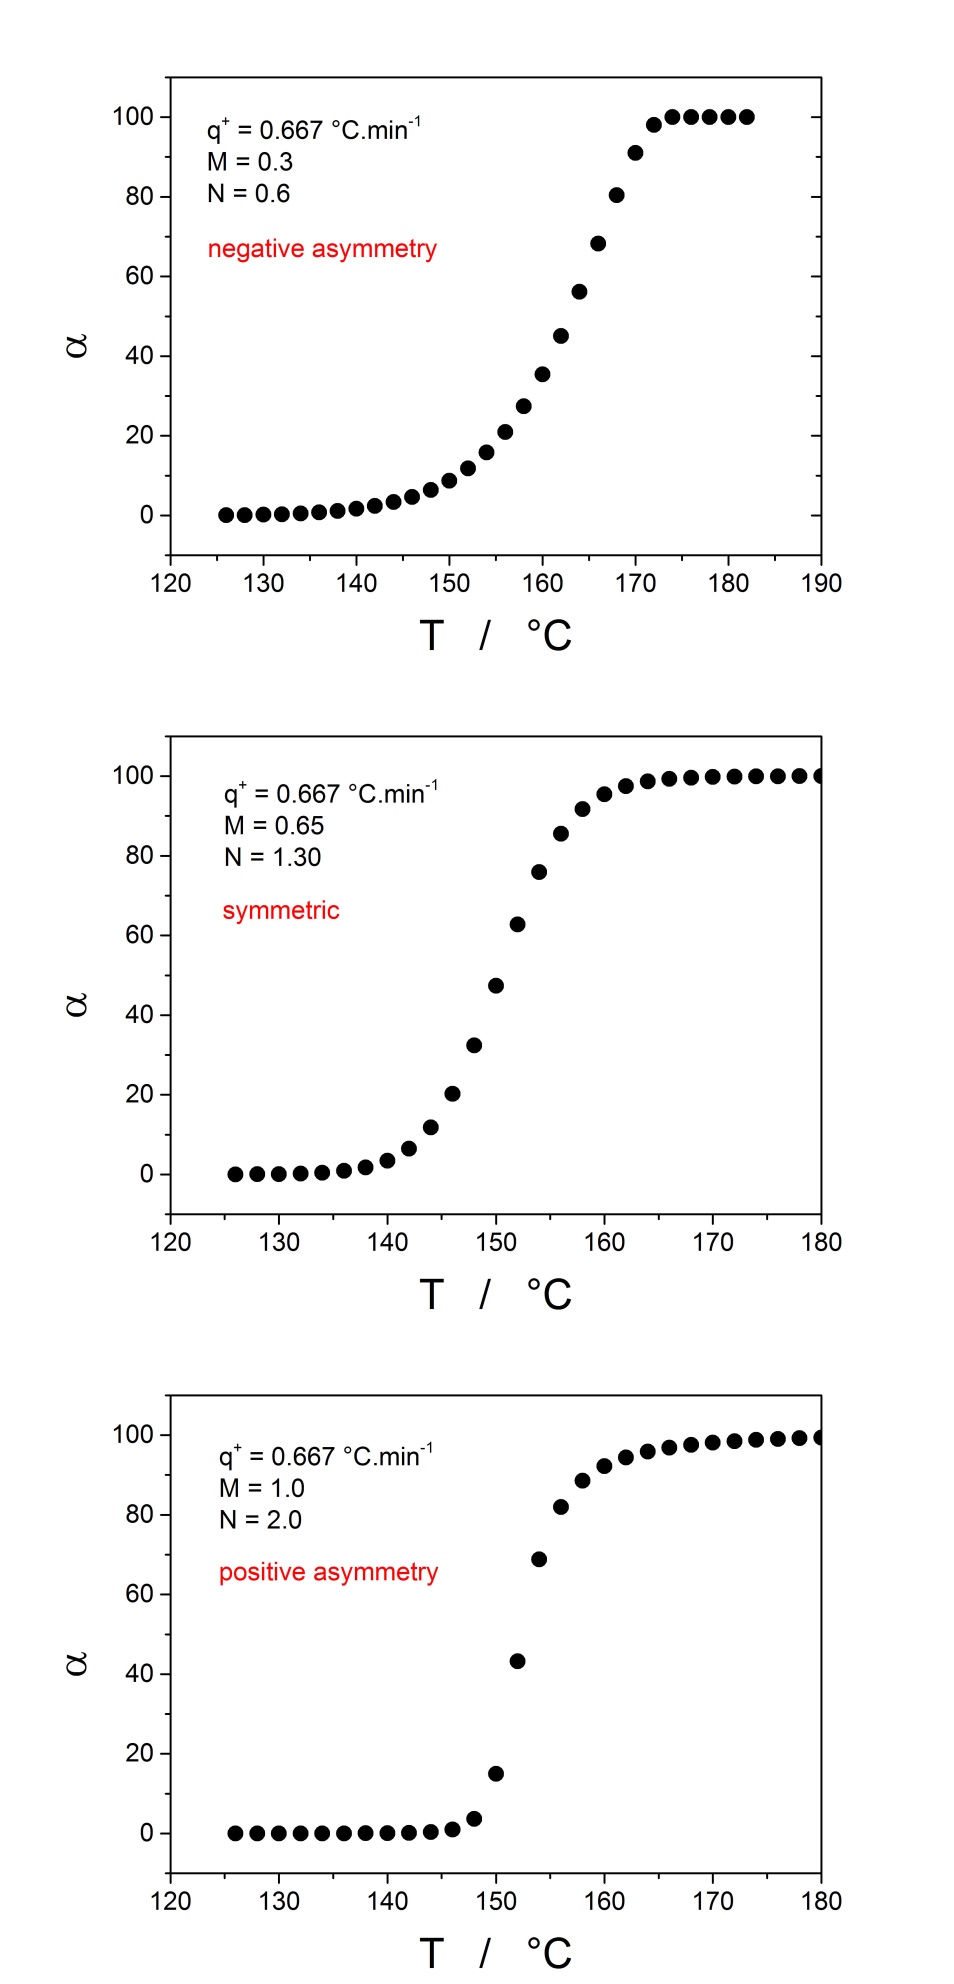


Fig. S2: Differential (dα/dt) data-curves corresponding to the integral data depicted in Fig. 4.


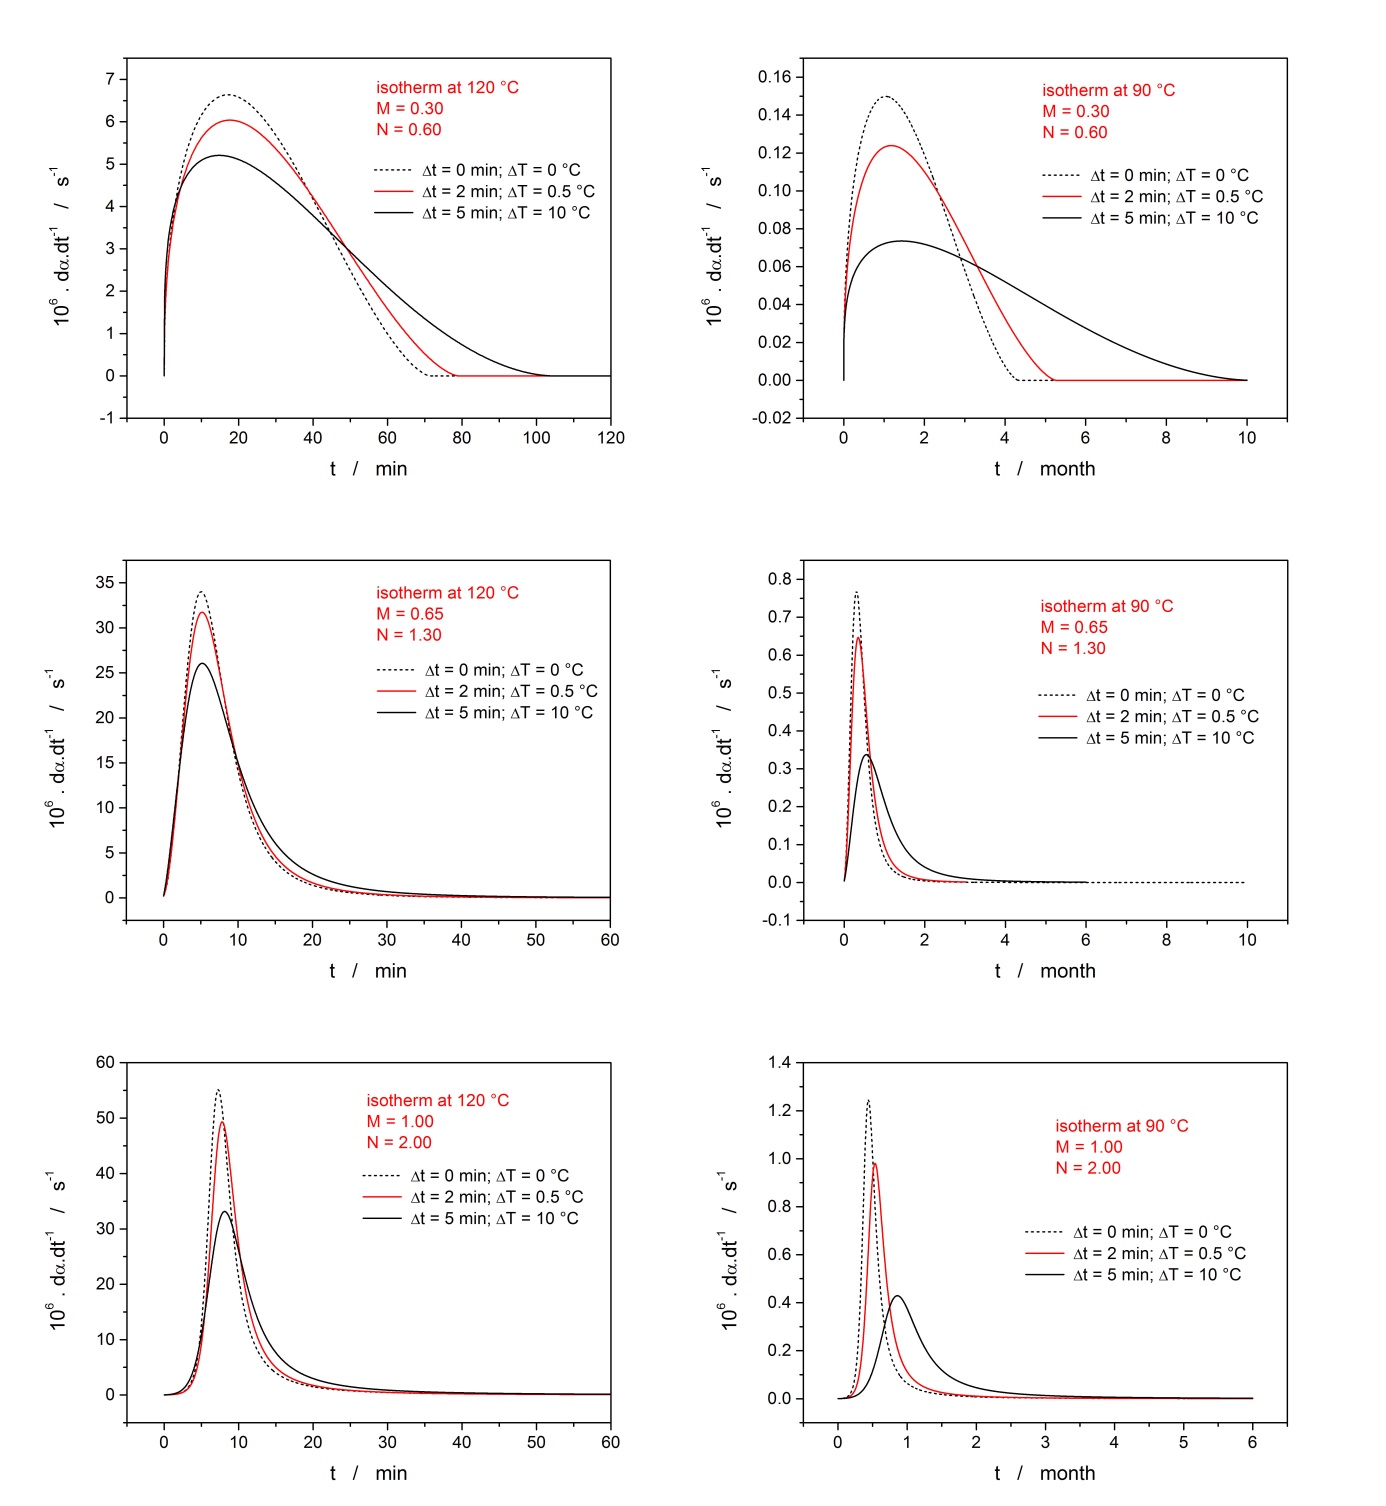


Fig. S3: Comparison of the standard (integral) XRD data-curves from Fig. 5 (points) and signals simulated for the similar *q+eff* at simple heating scan (lines).


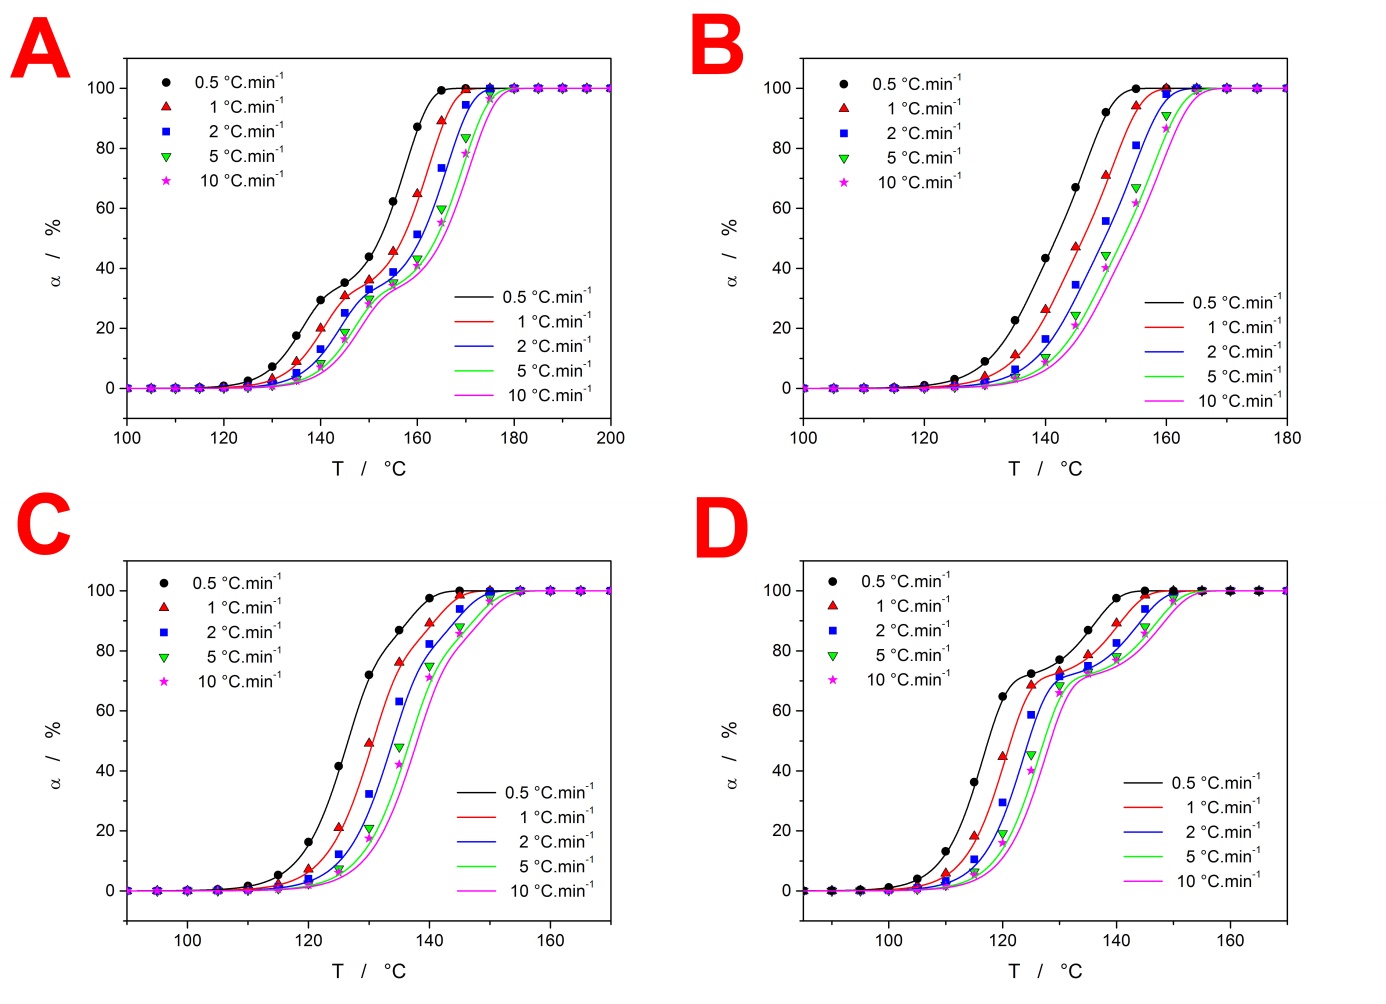


Fig. S4: Comparison of the standard (integral) XRD data-curves from Fig. 6 (points) and signals simulated for the similar *q+eff* at simple heating scan (lines).


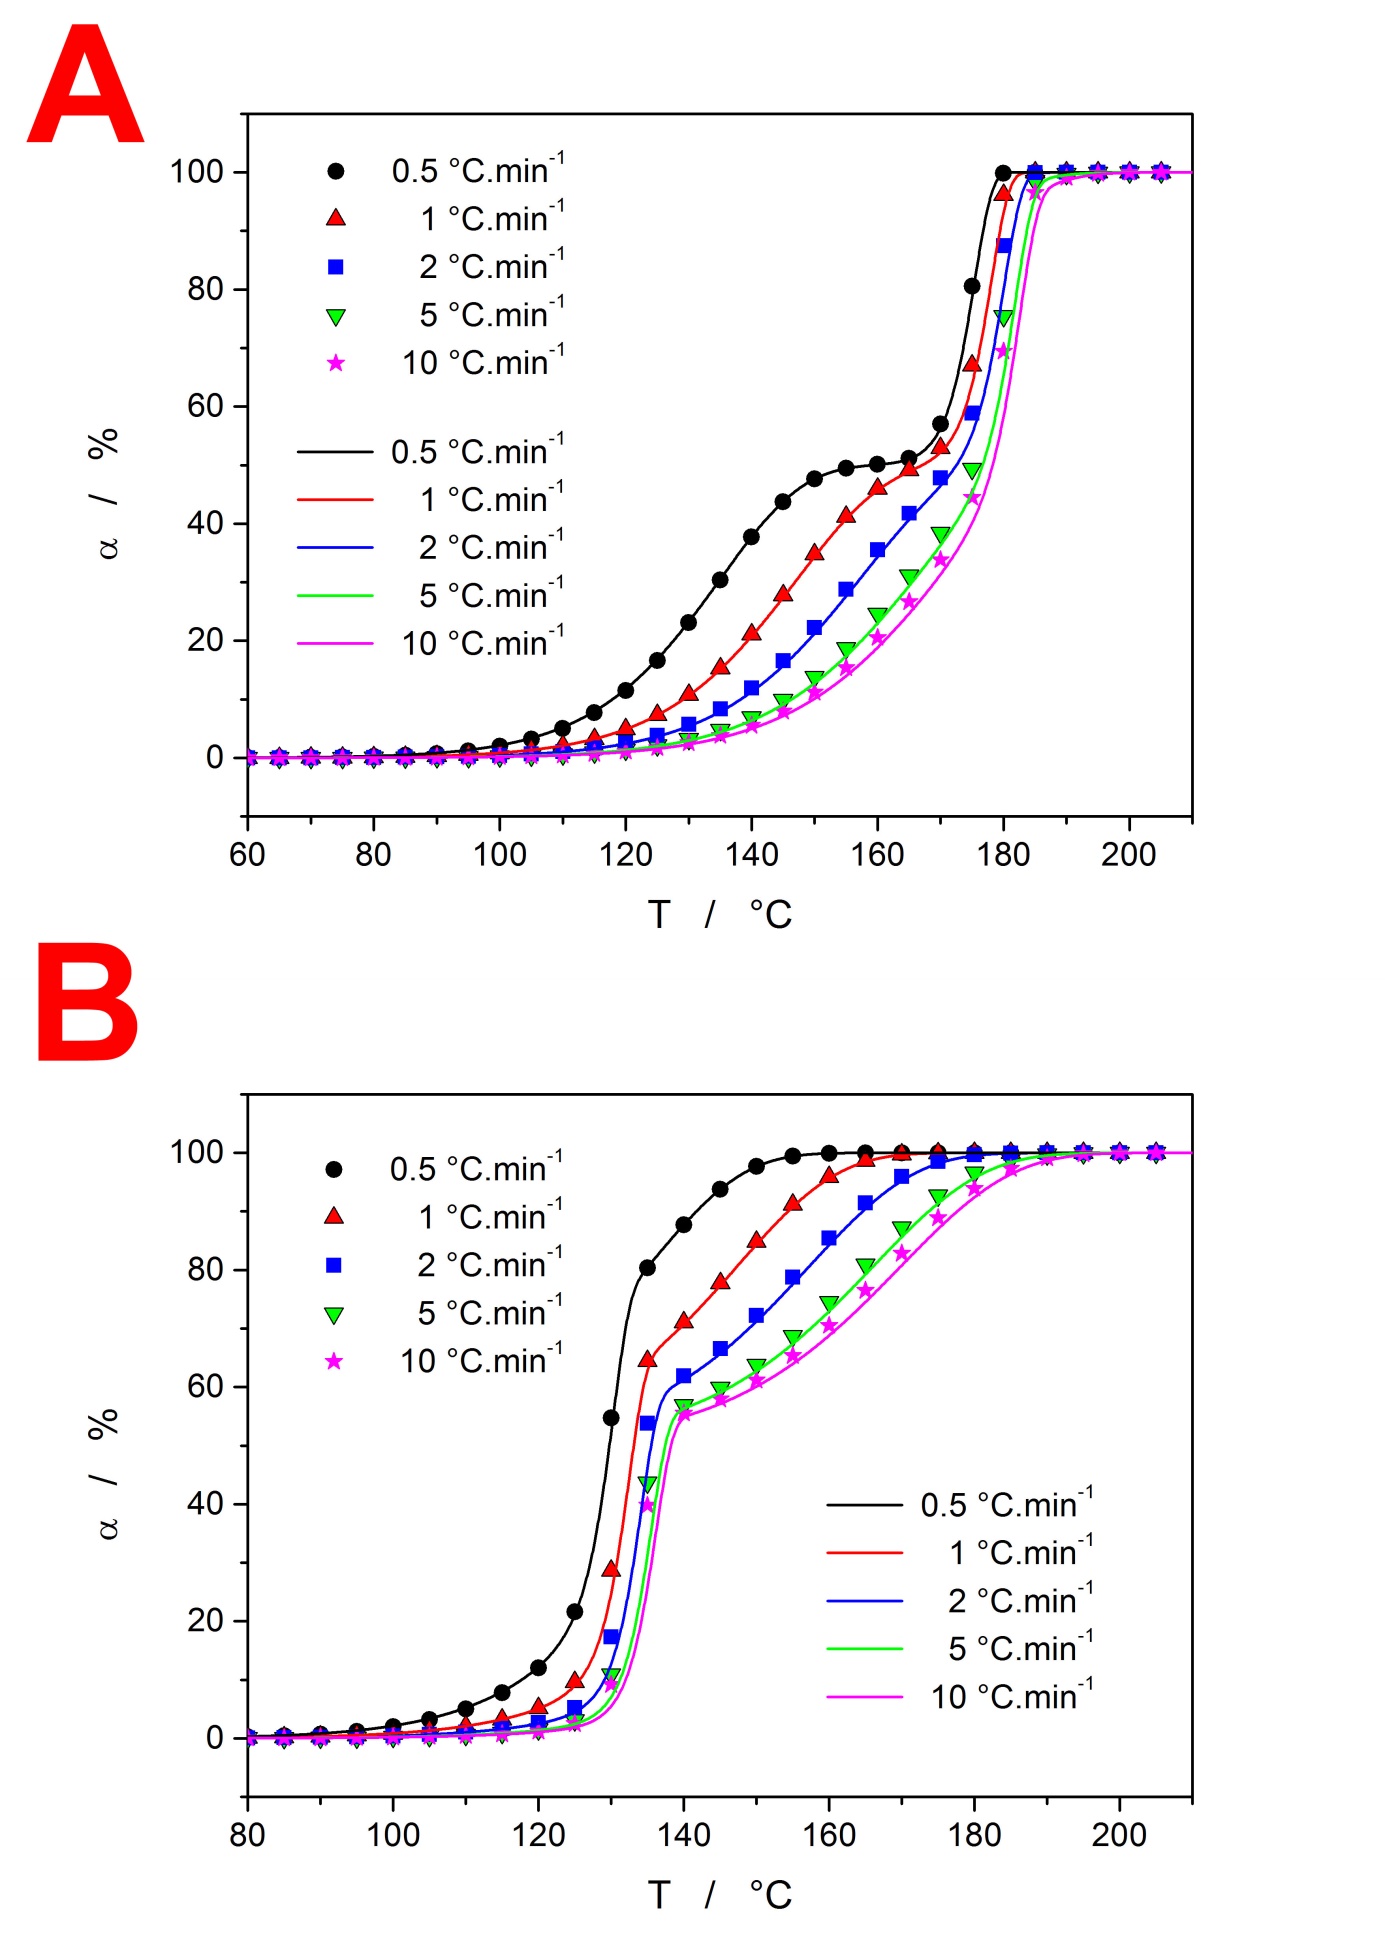

Supplement: Supplementary file 1 [file 20326614]
